# Supplementary material
Source: MDPI journal article supplement (https://www.mdpi.com/2073-445X/10/11/1257)
Supplement: s1 [file s1]

Archive with 3 entries (3 files):
- Supplementary file S1.pdf
- Supplementary file S2.pdf
- Supplementary file S3.pdf
