# Supplementary material
Source: MDPI journal article supplement (https://www.mdpi.com/2073-445X/10/11/1257)
Supplement: s1 [file s1 › Supplementary file S1.pdf]

|                                                                                 | Lahemaa NP                                                                                                                                                                                           | Vilsandi NP                                                                                                                                                                                                                                     | Soomaa NP                                                                                                                                                                                                                                         | Karula NP                                                                                                                                                                                      | Matsalu NP                                                                                                                                                                                                       |
|---------------------------------------------------------------------------------|------------------------------------------------------------------------------------------------------------------------------------------------------------------------------------------------------|-------------------------------------------------------------------------------------------------------------------------------------------------------------------------------------------------------------------------------------------------|---------------------------------------------------------------------------------------------------------------------------------------------------------------------------------------------------------------------------------------------------|------------------------------------------------------------------------------------------------------------------------------------------------------------------------------------------------|------------------------------------------------------------------------------------------------------------------------------------------------------------------------------------------------------------------|
| Coordinates                                                                     | 59°34'57"N 25°51'10"E                                                                                                                                                                                | 58° 22' 48" N 21° 52' 48" E                                                                                                                                                                                                                     | 58° 26' 24" N 25° 6' 36" E                                                                                                                                                                                                                        | 57° 42' 52" N 26° 29' 12" E                                                                                                                                                                    | 58°45'33"N 23°38'45"E                                                                                                                                                                                            |
| Year of NP designation                                                          | 1971                                                                                                                                                                                                 | 1993                                                                                                                                                                                                                                            | 1993                                                                                                                                                                                                                                              | 1993                                                                                                                                                                                           | 2004                                                                                                                                                                                                             |
| Area (km <sup>2</sup> )                                                         | 747                                                                                                                                                                                                  | 240                                                                                                                                                                                                                                             | 398                                                                                                                                                                                                                                               | 123                                                                                                                                                                                            | 486                                                                                                                                                                                                              |
| Year of original protection                                                     | 1971                                                                                                                                                                                                 | 1910                                                                                                                                                                                                                                            | 1957/1981*                                                                                                                                                                                                                                        | 1979                                                                                                                                                                                           | 1957                                                                                                                                                                                                             |
| Accessibility                                                                   | V. good, ~50 km from capital, ~40 km from reg. centre Rakvere.                                                                                                                                       | Poor, westernmost area of Estonia, on islands, a day trip from capital Tallinn.                                                                                                                                                                 | Rather poor, ~140km from Tallinn, ~40km from reg. centre Pärnu, only two main roads.                                                                                                                                                              | Rather good, but remote, ~240km from Tallinn, ~25 km from reg. centre Valga                                                                                                                    | Good, ~100km from capital Tallinn, ~20km from reg. centre Haapsalu                                                                                                                                               |
| Tourism (flows)                                                                 | Most visited NP in Estonia (foreign and domestic), mainly single day tourists.                                                                                                                       | Popular destination for bird watching (foreign tourists), seasonal, longer stays.                                                                                                                                                               | Popular during a short, flooded "fifth" season (domestic tourists), short or no stays.                                                                                                                                                            | Mainly regional domestic backpackers and campers, single day or camping in tents.                                                                                                              | Popular destination for bird watching (foreign tourists), seasonal, longer stays.                                                                                                                                |
| Tourism as source of income for locals                                          | Insignificant                                                                                                                                                                                        | Significant                                                                                                                                                                                                                                     | Intermediate                                                                                                                                                                                                                                      | Insignificant                                                                                                                                                                                  | Significant                                                                                                                                                                                                      |
| Landscape                                                                       | Picturesque diverse coastal landscape, 1/3 sea, Baltic cliff, numerous rivers, lakes, waterfalls, swamps, bogs and boulders. 73% of land area is forest, mosaic fields and semi-natural communities. | ~2/3 of the NP is a sea with ~160 islands and islets. Coastal meadows with junipers, numerous alvar grasslands, most orchid-rich area of Estonia, 47% of land covered with forests (mainly overgrown semi-nat. com.-s). Ramsar site since 1997. | Pristine natural conditions, 80% covered with bogs, swampy meadows and swamp forests. ~half of the area is periodically flooded (the fifth season). 15 km <sup>2</sup> flooded and wooded meadows, arable land only 0,5%. Ramsar site since 1997. | Hilly picturesque landscape, hills covered with forests and fields, depressions with lakes and swamps. ~70% of area covered with various old-growth forests. Rich in semi-natural communities. | Wetland and floodplain, incl. Matsalu Bay, 50 islets, several rivers, numerous semi-natural communities (coastal meadows and pastures, alluvial and wooded meadows). Ramsar site since 1976.                     |
| Permanent residents                                                             | ~4000                                                                                                                                                                                                | ~300                                                                                                                                                                                                                                            | ~50                                                                                                                                                                                                                                               | ~200                                                                                                                                                                                           | ~600                                                                                                                                                                                                             |
| Amount of temporary residents                                                   | Very high                                                                                                                                                                                            | High                                                                                                                                                                                                                                            | Very low                                                                                                                                                                                                                                          | Low                                                                                                                                                                                            | Intermediate                                                                                                                                                                                                     |
| Terrestrial land ownership                                                      | ~40% privately owned, ~3% unclaimed private land, ~57% state owned                                                                                                                                   | ~66% privately owned, ~26% unclaimed private land, ~7% state owned                                                                                                                                                                              | ~6% privately owned, ~2% unclaimed private land, ~92% state owned                                                                                                                                                                                 | ~26% privately owned, ~0,5% unclaimed private land, ~74% state owned                                                                                                                           | ~40% privately owned, ~1% unclaimed private land, ~59% state owned                                                                                                                                               |
| Main fields of occupation                                                       | Large proportion commutes to work outside of NP, private entrepreneurs are occupied mainly in agriculture and forestry, small proportion works for state and local government agencies.              | Many people are employed on site in nature tourism, local government and state agencies, education. Agricultural activity / landscape maintenance is concentrated to small group of entrepreneurs. Relatively high proportion retired people.   | Very few inhabitants, many of whom are active in the field of nature conservation (also telework) and nature tourism. Few families are active in landscape management and some people commute.                                                    | Very high proportion private entrepreneurs active in agriculture and landscape management, high proportion of telework. Some people commute and some work for state agencies.                  | High proportion private entrepreneurs active in agriculture and landscape management, often doing telework and/or tourism in parallel. High number of people occupied in nature conservation and nature tourism. |
| * 1957 first patch designated, 1981 last patch incorporated into protected area |                                                                                                                                                                                                      |                                                                                                                                                                                                                                                 |                                                                                                                                                                                                                                                   |                                                                                                                                                                                                |                                                                                                                                                                                                                  |
