# Supplementary material
Source: MDPI journal article supplement (https://www.mdpi.com/2073-445X/10/11/1257)
Supplement: s1 [file s1 › Supplementary file S3.pdf]

## Overview of the results.

| Profile of respondents                           | Lahemaa NP                                                    | Vilsandi NP                                                       | Soomaa NP                                                        | Karula NP                                                       | Matsalu NP                                                      |
|--------------------------------------------------|---------------------------------------------------------------|-------------------------------------------------------------------|------------------------------------------------------------------|-----------------------------------------------------------------|-----------------------------------------------------------------|
| Average age (years)                              | 49.9                                                          | 53.6                                                              | 45.8                                                             | 46.7                                                            | 54.3                                                            |
| Gender (% of resp.)                              | Male: 37.5<br>Female: 62.5                                    | Male: 58.3<br>Female: 41.7                                        | Male: 53.8<br>Female: 46.2                                       | Male: 72<br>Female: 28                                          | Male: 50<br>Female: 50                                          |
| Period lived in NP (years)                       | 26.4                                                          | 22.5                                                              | 17.7                                                             | 18.6                                                            | 28.7                                                            |
| Families lived in NP > 1 generation (% of resp.) | 34.4                                                          | 41.7                                                              | 26.9                                                             | 38.5                                                            | 31.8                                                            |
| Annual period of residency (% of resp.)          | Permanently: 93.5<br>Periodically: 6.5                        | Permanently: 65.2<br>Periodically: 34.8                           | Permanently: 86.4<br>Periodically: 13.6                          | Permanently: 92<br>Periodically: 8                              | Permanently: 95.5<br>Periodically: 4.5                          |
| Education (% of resp.)                           | Higher: 62.5<br>Vocational: 25<br>Secondary: 12.5<br>Basic: 0 | Higher: 54.2<br>Vocational: 20.8<br>Secondary: 20.8<br>Basic: 4.2 | Higher: 57.7<br>Vocational: 30.8<br>Secondary: 7.7<br>Basic: 3.3 | Higher: 46.2<br>Vocational: 38.5<br>Secondary: 15.4<br>Basic: 0 | Higher: 50<br>Vocational: 31.8<br>Secondary: 13.6<br>Basic: 4.5 |
| Occupation (% of resp.)                          | Private entrepreneur: 40.6<br>Employed: 46.9<br>Retired: 12.5 | Private entrepreneur: 25<br>Employed: 45.8<br>Retired: 29.2       | Private entrepreneur: 46.2<br>Employed: 38.5<br>Retired: 15.4    | Private entrepreneur: 50<br>Employed: 46.2<br>Retired: 3.8      | Private entrepreneur: 45.5<br>Employed: 40.9<br>Retired: 13.6   |

Profile of the respondents, based on questions number 22 to 27.

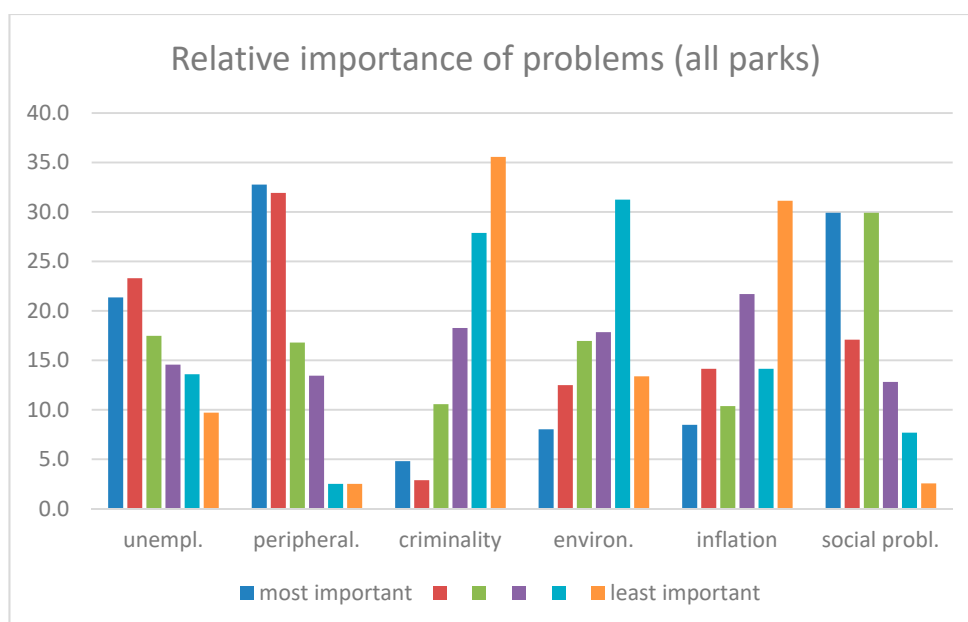

1. Graphical presentation of the answers to question no 1: Please rank the importance of the problems encountered in Estonia, marking the most important one with „1“ .

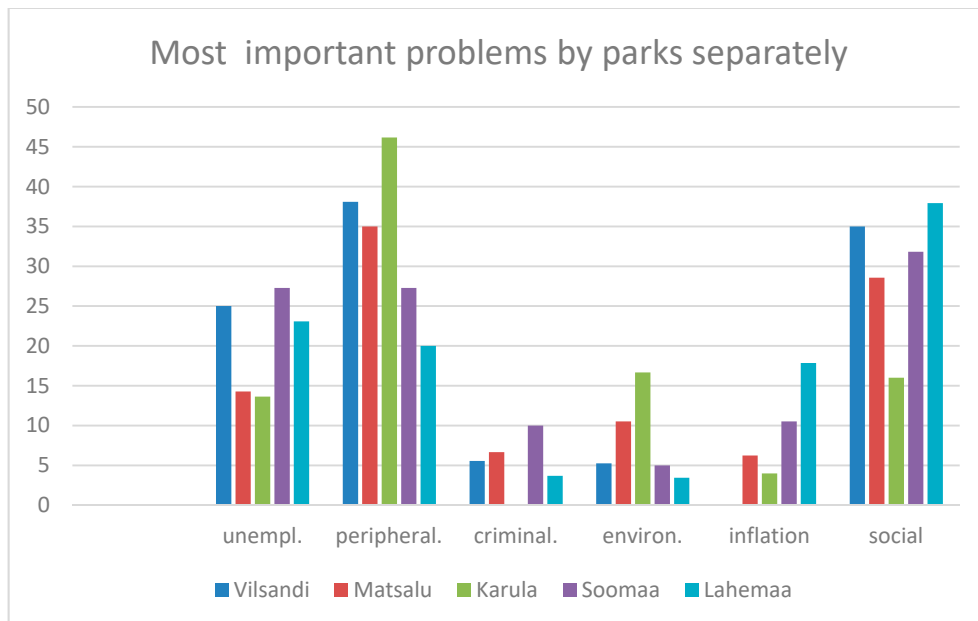

2. Most important problems (parks separately, question no 1).

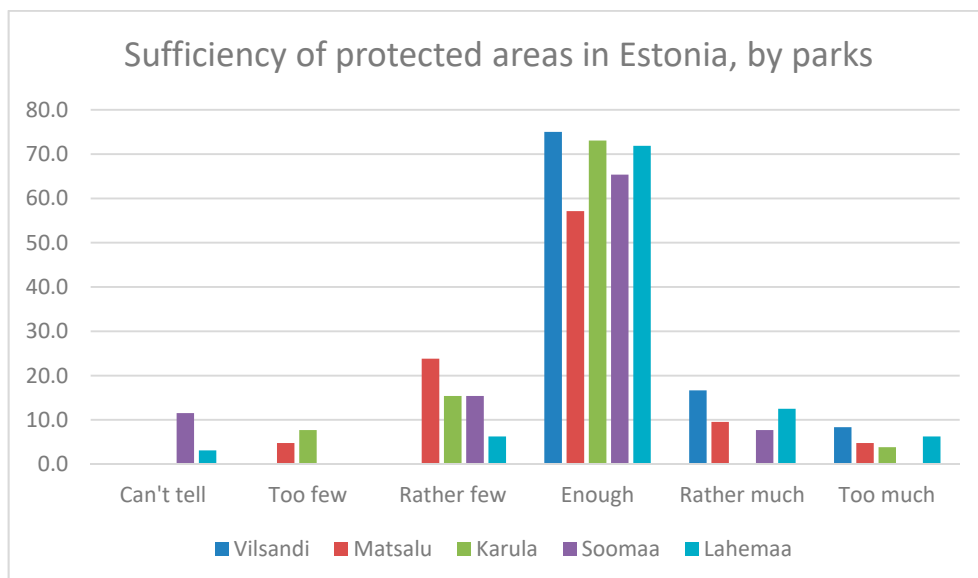

3. Graphical presentation of the answers to question no 3: What do You think of the amount/number/surface of protected areas in Estonia.

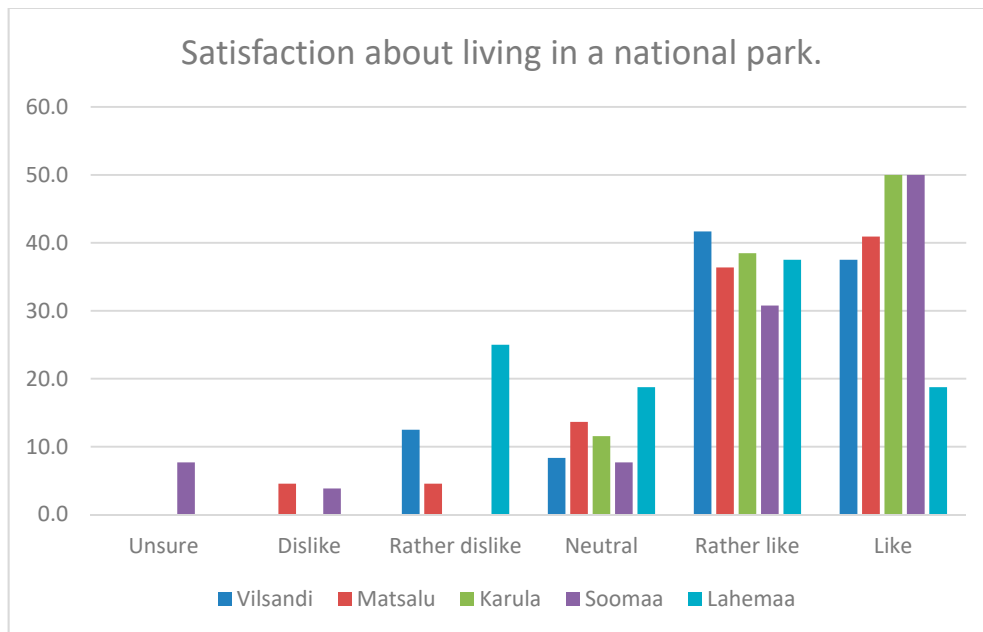

4. Graphical presentation of the answers to question no 4: Do you like that your residence is located in a protected area?

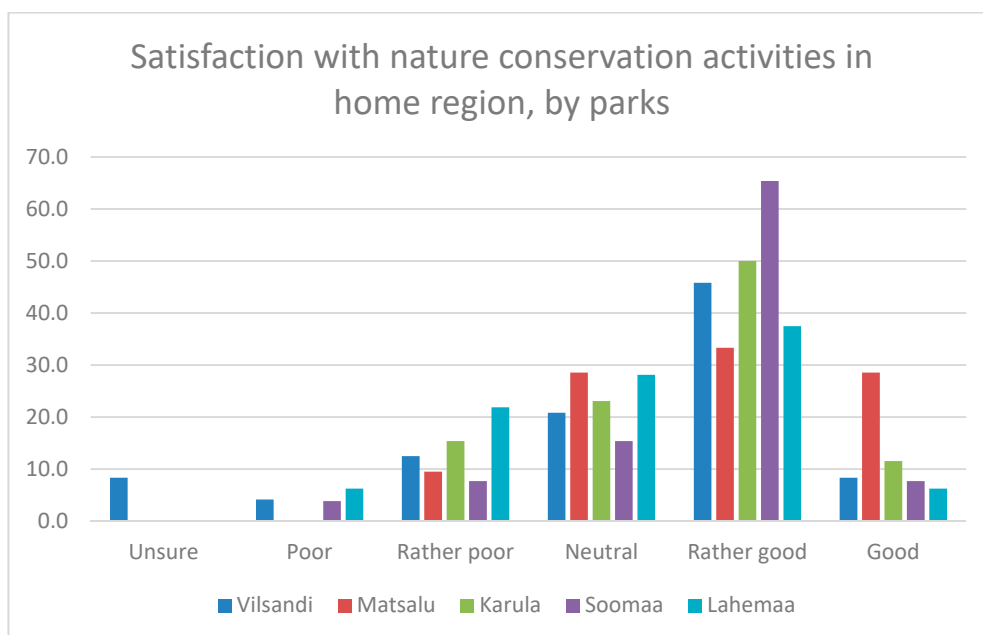

5. Graphical presentation of the answers to question no 6: How do you rank nature/environment protection activities in your home region?

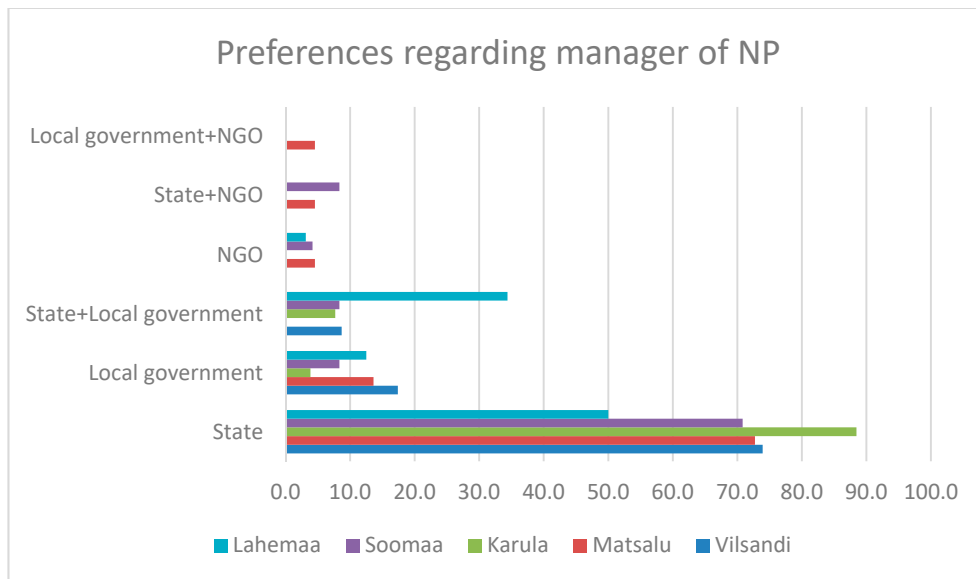

6. Graphical presentation of the answers to question no 12: Which institution/Who should be administrator of the protected area?

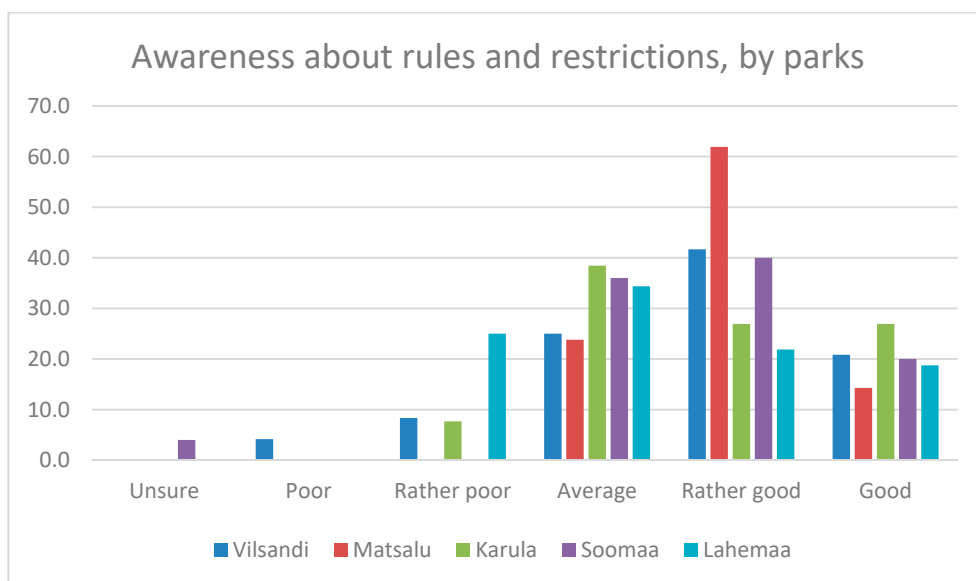

7. Graphical presentation of the answers to question no 7: Please rank your knowledge about nature protection rules and restrictions which are in force in your home region (How well do you know nature protection rules and restrictions which are in force in your home region?)

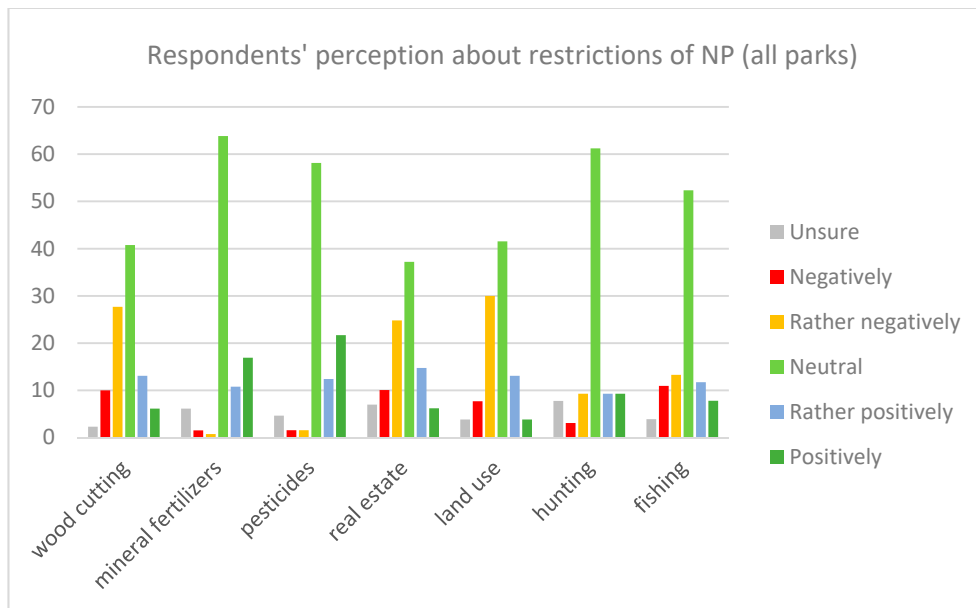

8. Graphical presentation of the answers to question no 8: How do following restrictions affect you?

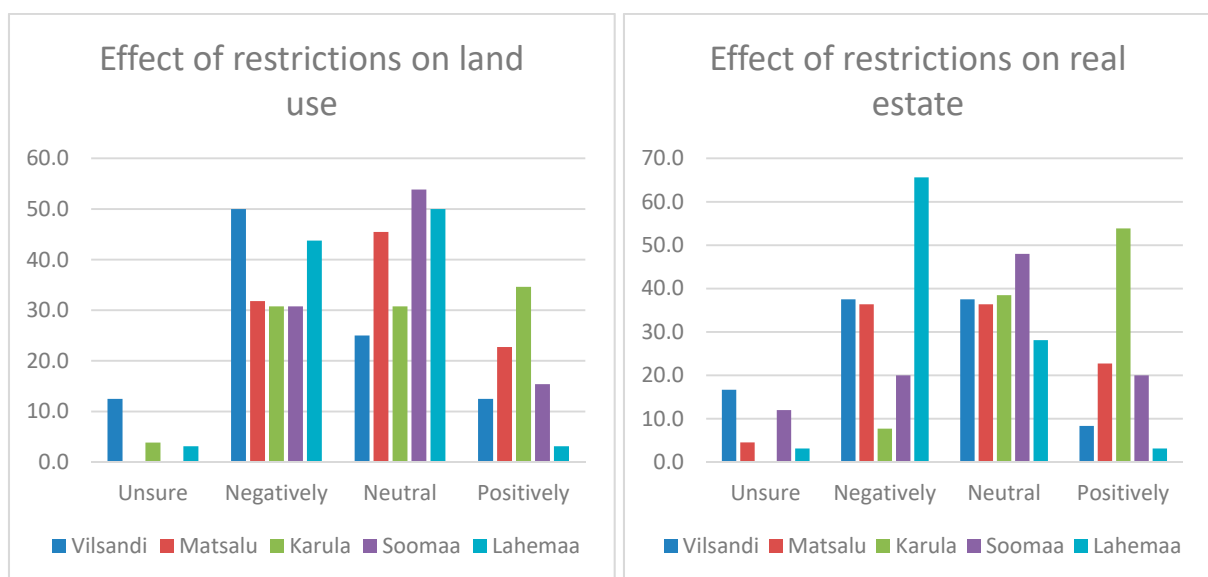

9. Graphical presentation of the answers to question no 8: How do following restrictions affect you (land use; real estate)?

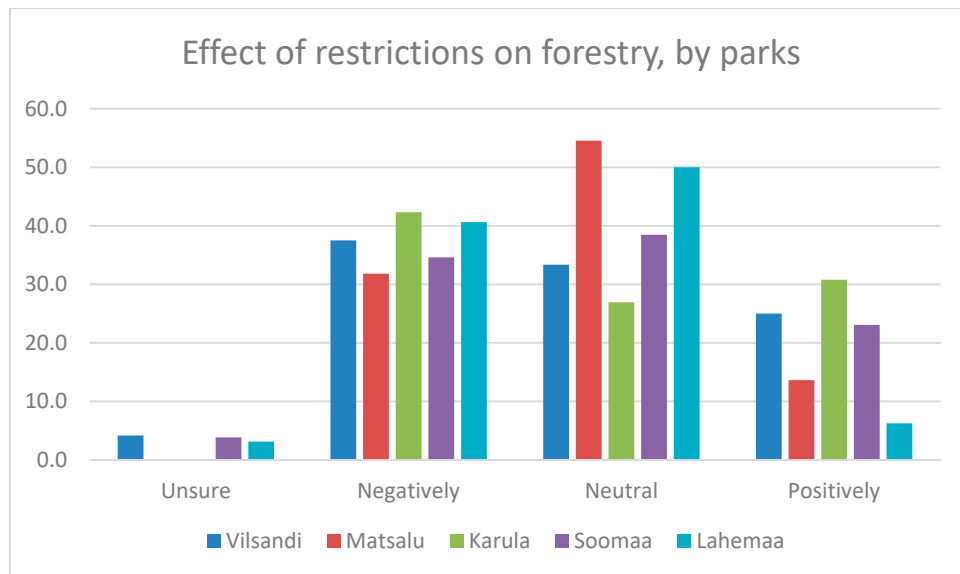

10. Graphical presentation of the answers to question no 8: How do following restrictions affect you (forestry)?

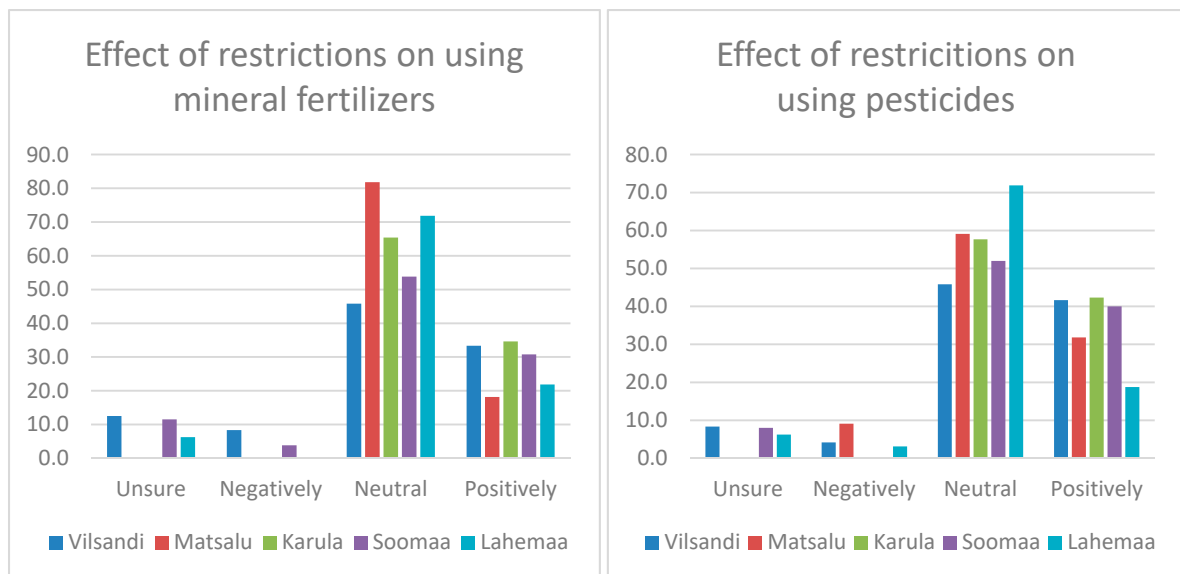

11. Graphical presentation of the answers to question no 8: How do following restrictions affect you (mineral fertilizers; pesticides)?

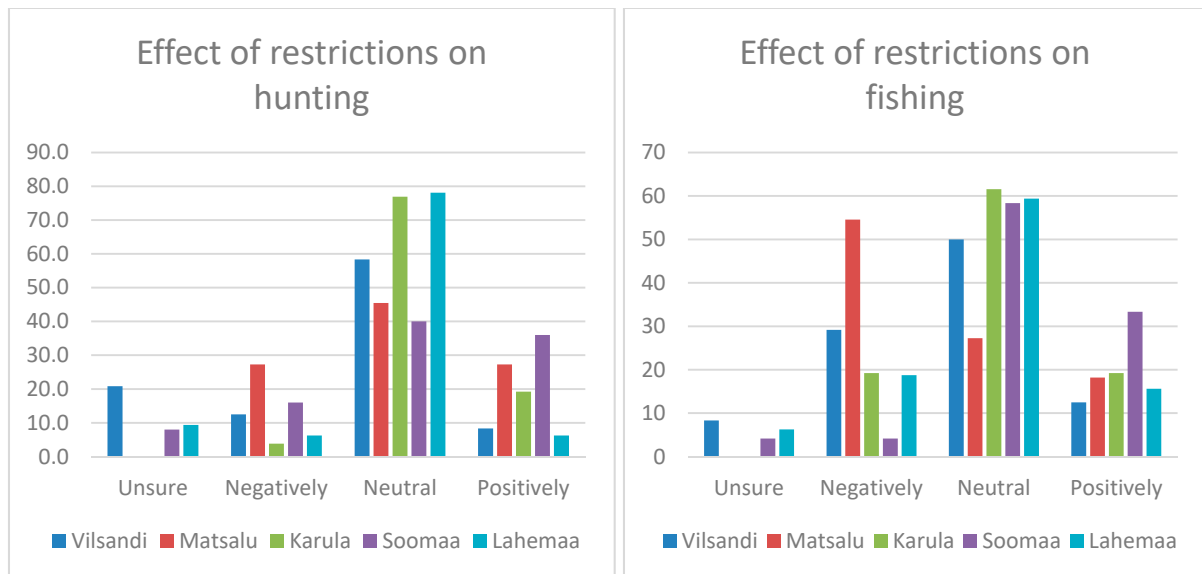

12. Graphical presentation of the answers to question no 8: How do following restrictions affect you (hunting; fishing)?

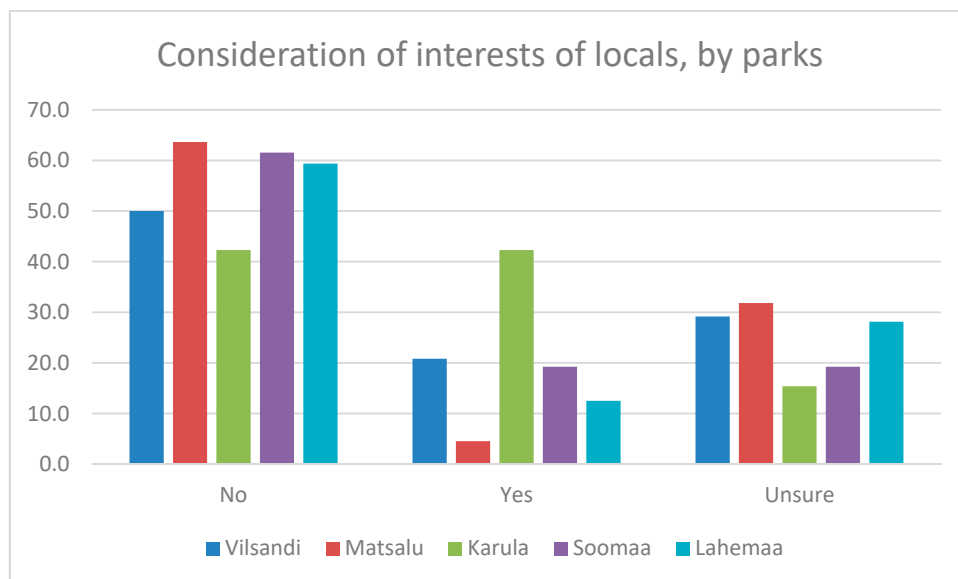

13. Graphical presentation of the answers to question no 9: Does protected area management plans and protection rules take enough consideration of the interests of permanent residents?

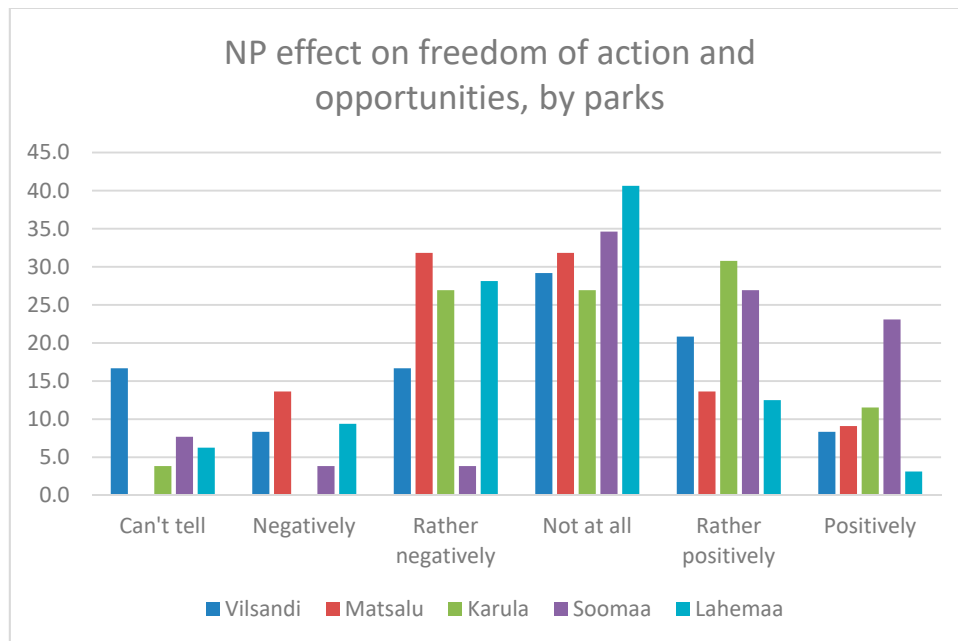

14. Graphical presentation of the answers to question no 11: How does residency in a protected area affect your freedom of action and opportunities?

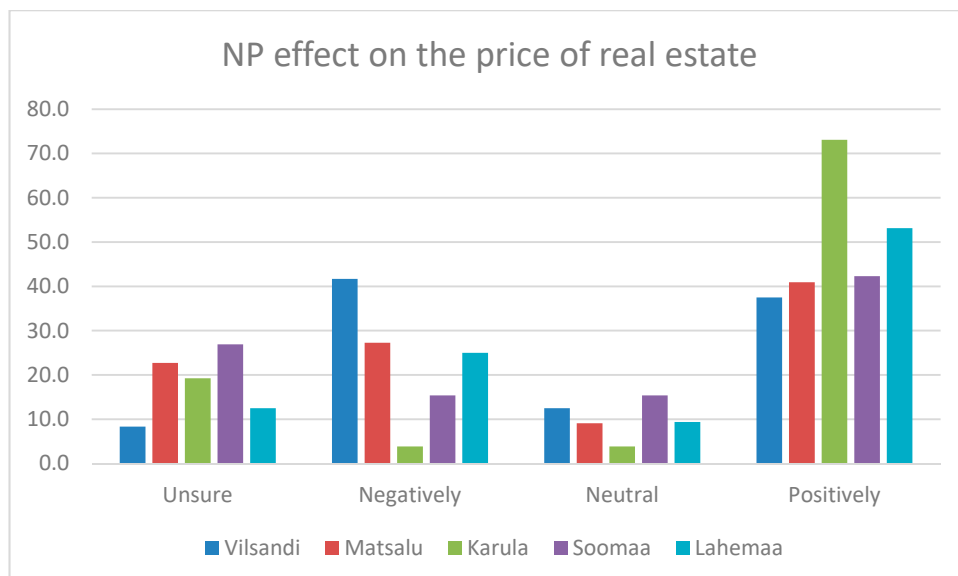

15. Graphical presentation of the answers to question no 13: How does location in protected area affect the price of real estate?

|                                                   | Vilsandi | Matsalu | Karula | Soomaa | Lahemaa |
|---------------------------------------------------|----------|---------|--------|--------|---------|
| Monetary compensation                             | 4        | 4       | 1      | 3      | 3       |
| The overall reduction of restrictions             | 5        | 5       | 6      | 6      | 5       |
| Reduction of restrictions for permanent residents | 1        | 1       | 3      | 1      | 1       |
| Complementary / alternative earning opportunities | 3        | 3       | 5      | 2      | 2       |
| Consultancy service                               | 6        | 6       | 4      | 5      | 6       |
| Compensatory measures (i.e. road construction)    | 2        | 2       | 2      | 4      | 4       |

16. Graphical presentation of the answers to question no 14: If there are disadvantages caused by restrictions, how should these be compensated? Please rank the following list, marking the most important one with „1“.

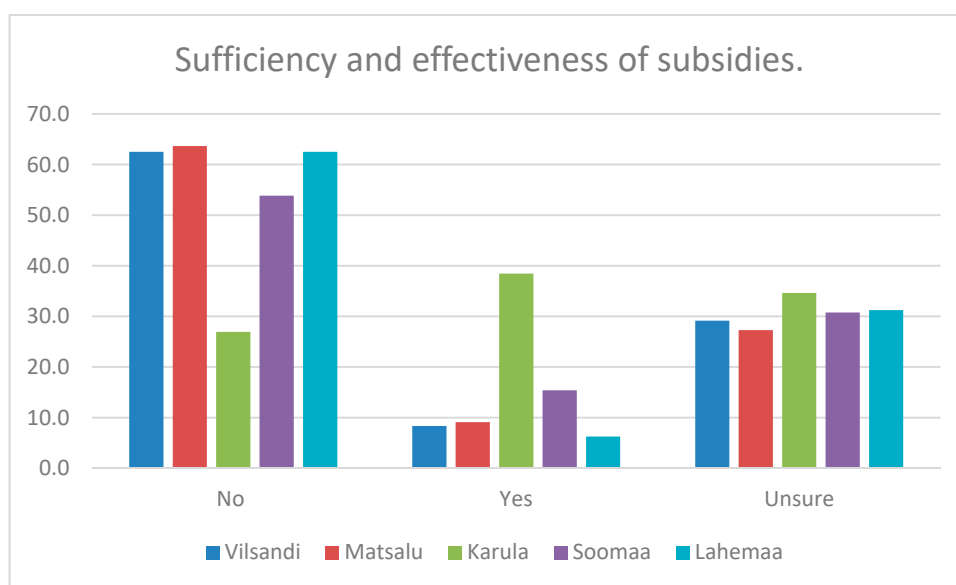

17. Graphical presentation of the answers to question no 20: Is the current system of subsidies effective / sufficient?

|                                                 | Vilsandi |             | Matsalu  |             | Karula   |             | Soomaa   |             | Lahemaa  |             |
|-------------------------------------------------|----------|-------------|----------|-------------|----------|-------------|----------|-------------|----------|-------------|
|                                                 | Niidumaa | Järv et al. |
| Abandonment and overgrowth of agricultural land | 1        | 1           | 1        | 5           | 1        | 5           | 1        | 2           | 1        | 1           |
| Inappropriate buildings                         | 5        | 4           | 5        | 4           | 5        | 4           | 5        | 5           | 5        | 5           |
| Crumbling buildings                             | 4        | 3           | 2        | 2           | 2        | 2           | 3        | 3           | 3/4      | 3           |
| Deforestation                                   | 3        | 5           | 4        | 3           | 4        | 3           | 4        | 1           | 3/4      | 4           |
| Waste thrown into environment                   | 2        | 2           | 3        | 1           | 3        | 1           | 2        | 4           | 2        | 2           |

18. Graphical presentation of the answers to question no 17: Which factors do you find annoying in the landscapes of your home region? Please rank the list below, marking the most important one with „1“. Results compared with the results of previous study (Niidumaa, 2009).

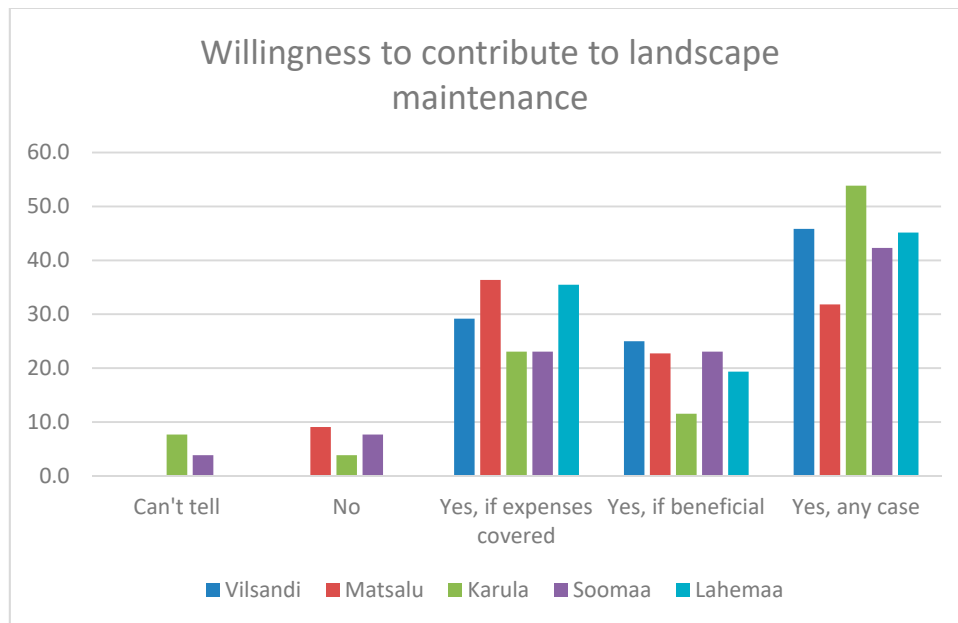

19. Graphical presentation of the answers to question no 19: Are you willing to take care/maintain landscape in your home region?

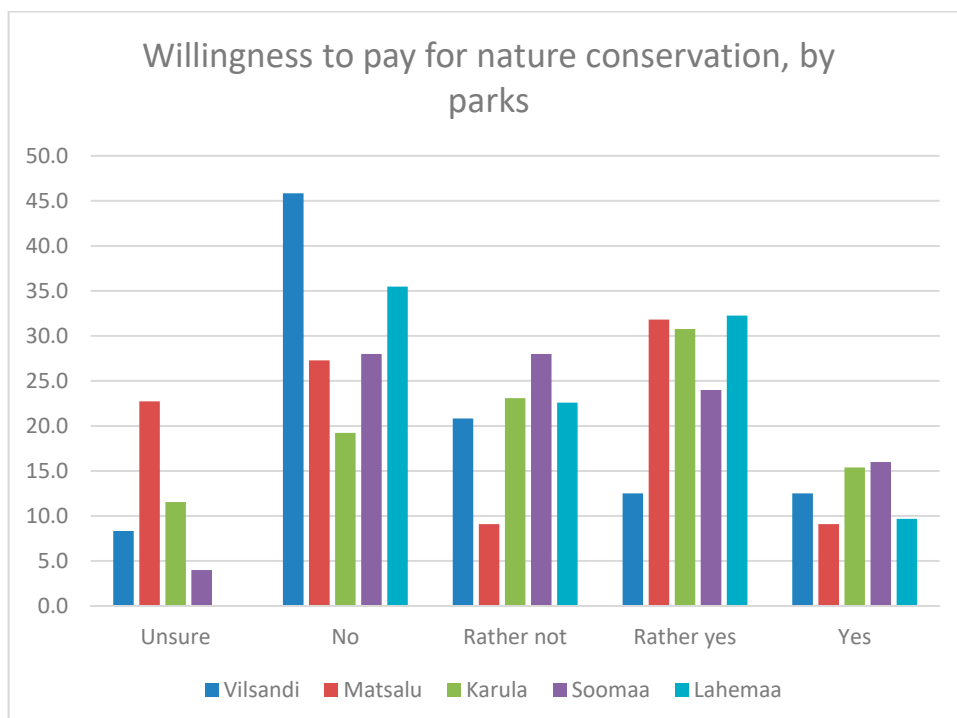

20. Graphical presentation of the answers to question no 16: Are you willing to pay higher prices on behalf of nature conservation/protection in your home region?
